# Supplementary material
Source: PubMed Central journal article supplement (PMC3205315)
Supplement: NIHMS331056-supplement-1_si_001.pdf [file NIHMS331056-supplement-1_si_001.pdf]

# Supporting Information

## Metal-Sulfur Valence Orbital Interaction Energies in Metal– Dithiolene Complexes: Determination of Charge and Overlap Interaction Energies by Comparison of Core and Valence Ionization Energy Shifts

*Nicholas J. Wiebelhaus, Matthew A. Cranswick, Eric L. Klein, L. Tori Lockett, Dennis L.*

*Lichtenberger,\* and John H. Enemark\**

\*Department of Chemistry, The University of Arizona, Tucson, Arizona 85721

Email: [jenemark@u.arizona.edu](mailto:jenemark@u.arizona.edu) [dlichten@email.arizona.edu](mailto:dlichten@email.arizona.edu)

### Contents

|                                                                |     |
|----------------------------------------------------------------|-----|
| • Figure S1 .....                                              | S2  |
| • Table S1 .....                                               | S3  |
| • Figure S2 .....                                              | S4  |
| • Table S2 .....                                               | S4  |
| • Figure S3 .....                                              | S5  |
| • Table S3 .....                                               | S5  |
| • Figure S4 .....                                              | S6  |
| • Coordinates used for orbital plots                           |     |
| - Cp <sub>2</sub> Mo(bdt) .....                                | S7  |
| - Cp <sub>2</sub> V(bdt) .....                                 | S8  |
| - Cp <sub>2</sub> Ti(bdt) .....                                | S9  |
| • Figure S5 .....                                              | S10 |
| • Coordinates for distorted H <sub>2</sub> bdt structure ..... | S11 |
| • Table S4 .....                                               | S11 |

### S 2p Ionizations

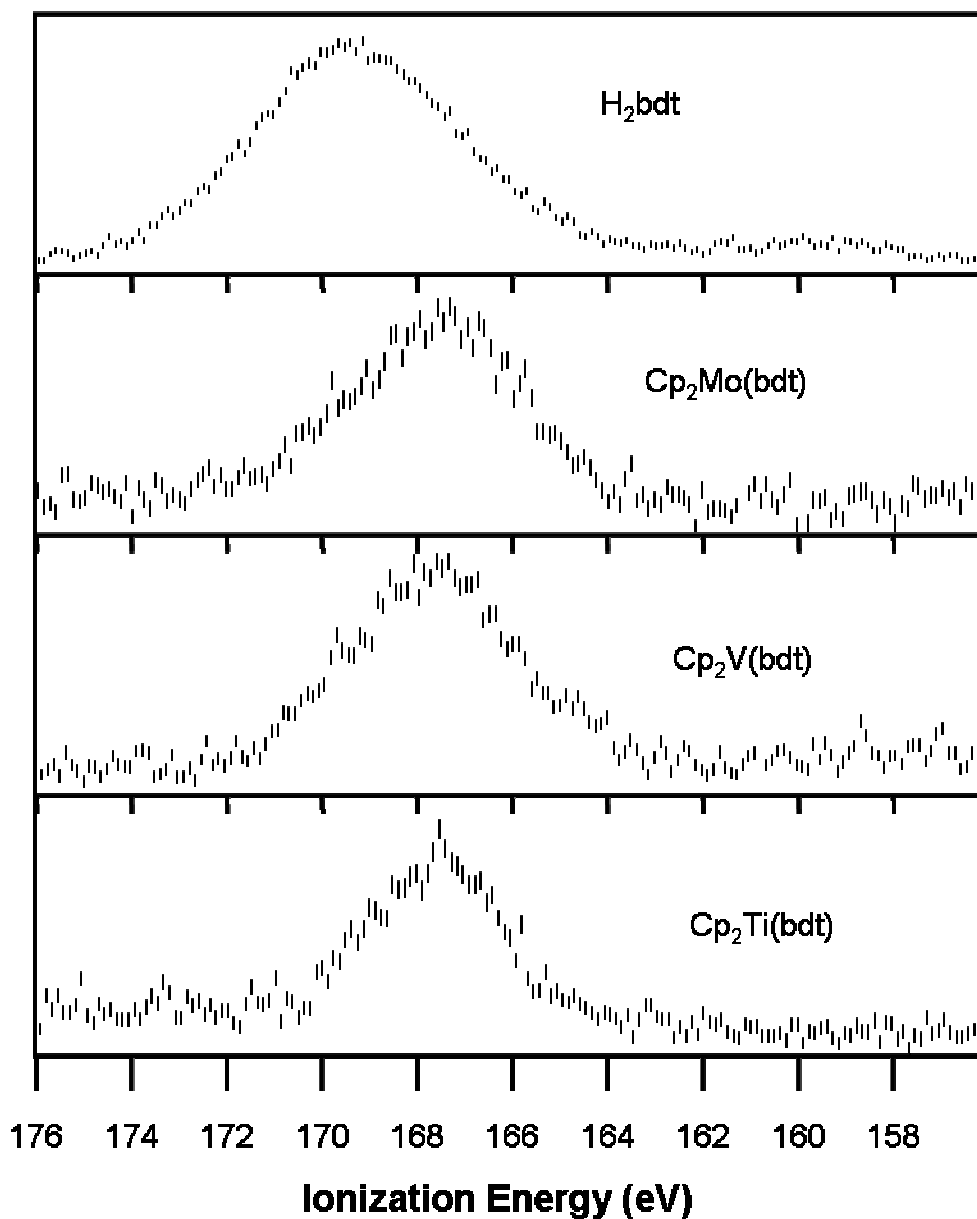

**Figure S1.** The summed X-ray photoelectron spectra of the S 2p region for the benzene dithiol and the series  $Cp_2M(bdt)$  where  $M = Mo, V \text{ \& } Ti$  and  $bdt = benzenedithiolate$ .

**Table S1.** S 2p<sub>3/2</sub> Ionization energies.

| Scan  | H <sub>2</sub> bdt | Cp <sub>2</sub> Mo(bdt) | Cp <sub>2</sub> V(bdt) | Cp <sub>2</sub> Ti(bdt) |
|-------|--------------------|-------------------------|------------------------|-------------------------|
| 1     | 169.258            | 167.437                 | 167.084                | 167.264                 |
| 2     | 169.321            | 167.567                 | 167.067                | 167.627                 |
| 3     | 169.371            | 166.961                 | 166.926                | 167.376                 |
| 4     | 169.236            | 167.315                 | 167.124                | 167.408                 |
| 5     | 169.476            | 167.158                 | 167.016                | 167.581                 |
| 6     | 169.321            | 167.173                 | 167.243                | 167.311                 |
| 7     | 169.442            | 167.240                 | 167.107                | 167.318                 |
| 8     | 169.101            | 167.061                 | 167.390                | --                      |
| 9     | 169.247            | 167.116                 | 167.441                | --                      |
| 10    | 169.272            | 167.365                 | 167.261                | --                      |
| 11    | 169.204            | 167.329                 | 167.343                | --                      |
| 12    | 169.118            | --                      | --                     | --                      |
| AVG   | 169.281            | 167.247                 | 167.182                | 167.412                 |
| STDEV | 0.114              | 0.176                   | 0.165                  | 0.140                   |

## V 2p Ionizations

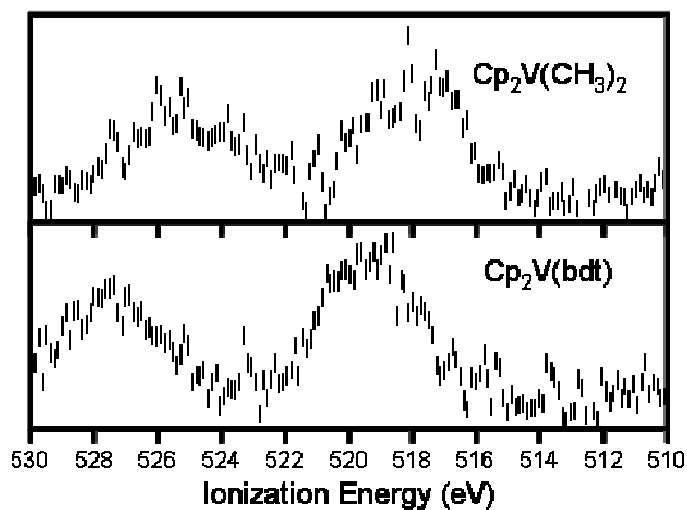

**Figure S2.** The summed X-ray photoelectron spectra of the V 2p region for  $\text{Cp}_2\text{V}(\text{CH}_3)_2$  and  $\text{Cp}_2\text{V}(\text{bdt})$ .

**Table S2.** V  $2p_{3/2}$  ionization energies

| Scan  | $\text{Cp}_2\text{V}(\text{CH}_3)_2$ | $\text{Cp}_2\text{V}(\text{bdt})$ |
|-------|--------------------------------------|-----------------------------------|
| 1     | 518.155                              | 519.071                           |
| 2     | 518.720                              | 519.337                           |
| 3     | 519.033                              | 519.522                           |
| 4     | 518.913                              | 519.558                           |
| 5     | 518.684                              | 519.512                           |
| 6     | 518.684                              | 519.535                           |
| 7     | 518.606                              | 519.169                           |
| 8     | --                                   | 519.179                           |
| 9     | --                                   | 519.277                           |
| AVG   | 518.685                              | 519.351                           |
| STDEV | 0.277                                | 0.187                             |

### Mo 3d Ionizations

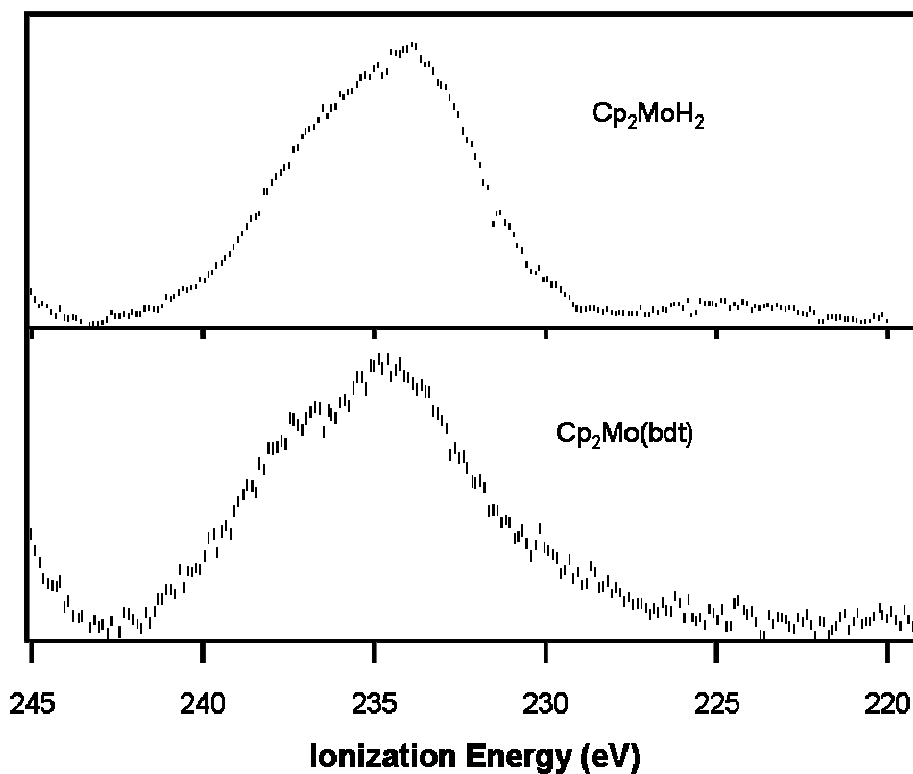

**Figure S3.** The summed X-ray photoelectron spectra of the Mo 3d region for  $\text{Cp}_2\text{MoH}_2$  and  $\text{Cp}_2\text{Mo}(\text{bdt})$ .

**Table S3.** Mo  $3d_{5/2}$  ionization energies

| Scan  | $\text{Cp}_2\text{MoH}_2$ | $\text{Cp}_2\text{Mo}(\text{bdt})$ |
|-------|---------------------------|------------------------------------|
| 1     | 233.834                   | 234.633                            |
| 2     | 233.743                   | 234.580                            |
| 3     | 234.010                   | 234.423                            |
| 4     | 233.932                   | 234.66                             |
| 5     | 233.872                   | 234.440                            |
| 6     | 234.102                   | 234.532                            |
| 7     | 234.113                   | 234.560                            |
| 8     | 234.103                   | 234.446                            |
| 9     | 234.056                   | 234.628                            |
| 10    | 233.984                   | 234.611                            |
| 11    | 233.895                   | 234.812                            |
| 12    | 233.897                   | 234.578                            |
| 13    | 233.874                   | --                                 |
| 14    | 233.848                   | --                                 |
| AVG   | 233.947                   | 234.575                            |
| STDEV | 0.116                     | 0.110                              |

### Full UPS Spectra

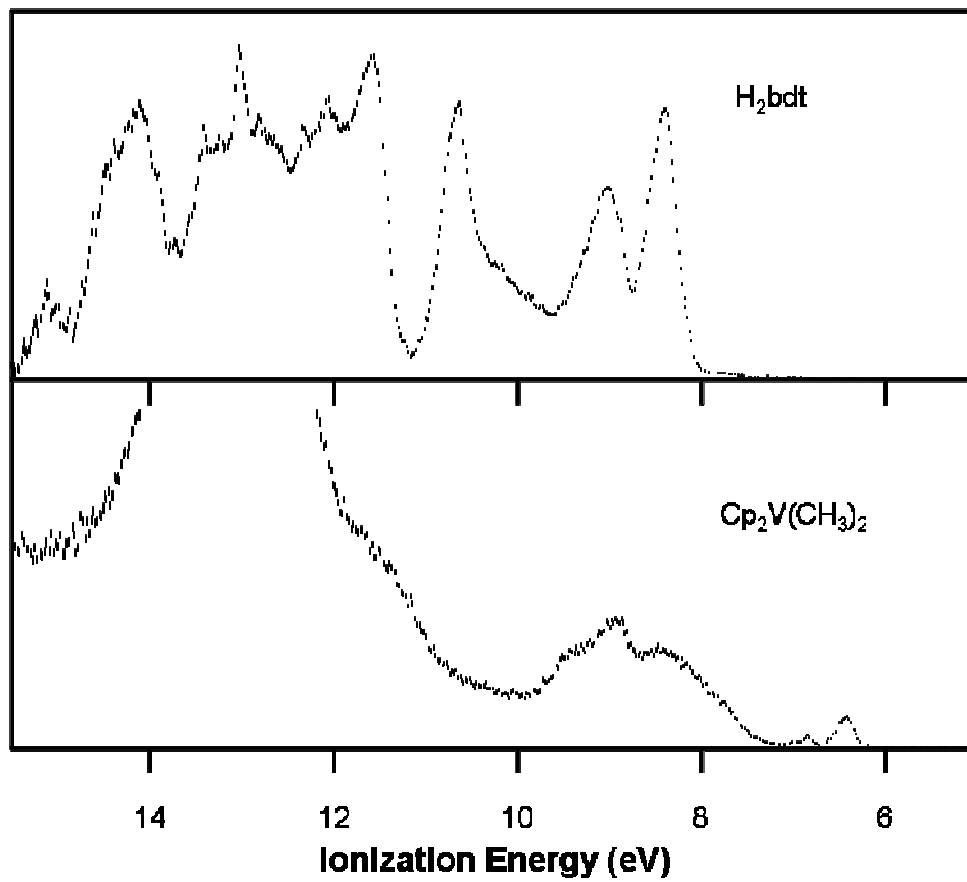

**Figure S4.** The UV photoelectron spectrum of benzenedithiol and  $Cp_2V(CH_3)_2$ .

### Coordinates used for orbital plots

Cp<sub>2</sub>Mo(bdt)

|    |           |           |           |
|----|-----------|-----------|-----------|
| Mo | 0.026407  | 0.027731  | 0.000000  |
| S  | 1.850842  | 0.103266  | -1.599475 |
| S  | 1.850842  | 0.103266  | 1.599475  |
| C  | 3.387102  | 0.116332  | -0.703132 |
| C  | 3.387102  | 0.116332  | 0.703132  |
| C  | 4.609234  | 0.138632  | -1.397615 |
| C  | 4.609234  | 0.138632  | 1.397615  |
| C  | 5.818029  | 0.162140  | -0.701021 |
| C  | 5.818029  | 0.162140  | 0.701021  |
| H  | 4.601483  | 0.138479  | -2.489024 |
| H  | 4.601483  | 0.138479  | 2.489024  |
| H  | 6.759954  | 0.180268  | -1.251081 |
| H  | 6.759954  | 0.180268  | 1.251081  |
| C  | 0.168724  | 2.359303  | 0.000000  |
| C  | -0.604367 | 2.031032  | -1.161273 |
| C  | -0.604367 | 2.031032  | 1.161273  |
| C  | -1.842839 | 1.506993  | -0.713669 |
| C  | -1.842839 | 1.506993  | 0.713669  |
| H  | 1.167377  | 2.778413  | 0.000000  |
| H  | -0.300286 | 2.173998  | -2.192573 |
| H  | -0.300286 | 2.173998  | 2.192573  |
| H  | -2.640533 | 1.135572  | -1.351086 |
| H  | -2.640533 | 1.135572  | 1.351086  |
| C  | -1.809641 | -1.444325 | 0.000000  |
| C  | -1.037117 | -1.768090 | -1.164235 |
| C  | -1.037117 | -1.768090 | 1.164235  |
| C  | 0.175092  | -2.368457 | -0.703505 |
| C  | 0.175092  | -2.368457 | 0.703505  |
| H  | -2.817812 | -1.047564 | 0.000000  |
| H  | -1.349648 | -1.674010 | -2.199713 |
| H  | -1.349648 | -1.674010 | 2.199713  |
| H  | 0.997592  | -2.694490 | -1.330462 |
| H  | 0.997592  | -2.694490 | 1.330462  |

Cp<sub>2</sub>V(bdt)

|   |           |           |           |
|---|-----------|-----------|-----------|
| V | 0.057598  | -0.099107 | 0.000000  |
| S | 1.866425  | -0.440368 | -1.588724 |
| S | 1.866425  | -0.440368 | 1.588724  |
| C | 3.276049  | 0.165119  | -0.709854 |
| C | 3.276049  | 0.165119  | 0.709854  |
| C | 4.428978  | 0.584316  | -1.398939 |
| C | 4.428978  | 0.584316  | 1.398939  |
| C | 5.569383  | 0.981610  | -0.701313 |
| C | 5.569383  | 0.981610  | 0.701313  |
| H | 4.420708  | 0.587197  | -2.489772 |
| H | 4.420708  | 0.587197  | 2.489772  |
| H | 6.457483  | 1.296662  | -1.250775 |
| H | 6.457483  | 1.296662  | 1.250775  |
| C | 0.752999  | 2.141760  | 0.000000  |
| C | -0.062921 | 1.964358  | -1.154142 |
| C | -0.062921 | 1.964358  | 1.154142  |
| C | -1.369030 | 1.651322  | -0.717223 |
| C | -1.369030 | 1.651322  | 0.717223  |
| H | 1.817396  | 2.353242  | 0.000000  |
| H | 0.272748  | 2.021584  | -2.183613 |
| H | 0.272748  | 2.021584  | 2.183613  |
| H | -2.221239 | 1.443371  | -1.357452 |
| H | -2.221239 | 1.443371  | 1.357452  |
| C | -2.043182 | -1.143744 | 0.000000  |
| C | -1.339710 | -1.591759 | -1.154854 |
| C | -1.339710 | -1.591759 | 1.154854  |
| C | -0.230446 | -2.363491 | -0.708587 |
| C | -0.230446 | -2.363491 | 0.708587  |
| H | -2.953043 | -0.553214 | 0.000000  |
| H | -1.613429 | -1.406118 | -2.189486 |
| H | -1.613429 | -1.406118 | 2.189486  |
| H | 0.511654  | -2.841976 | -1.336841 |
| H | 0.511654  | -2.841976 | 1.336841  |



Cp<sub>2</sub>Ti(bdt)

|    |           |           |           |
|----|-----------|-----------|-----------|
| Ti | 0.126858  | -0.131872 | 0.000000  |
| S  | 1.881639  | -0.590684 | -1.584868 |
| S  | 1.881639  | -0.590684 | 1.584868  |
| C  | 3.191652  | 0.156002  | -0.713063 |
| C  | 3.191652  | 0.156002  | 0.713063  |
| C  | 4.300951  | 0.686837  | -1.394486 |
| C  | 4.300951  | 0.686837  | 1.394486  |
| C  | 5.388365  | 1.191151  | -0.699974 |
| C  | 5.388365  | 1.191151  | 0.699974  |
| H  | 4.294028  | 0.690765  | -2.482834 |
| H  | 4.294028  | 0.690765  | 2.482834  |
| H  | 6.243254  | 1.587206  | -1.247123 |
| H  | 6.243254  | 1.587206  | 1.247123  |
| C  | 0.881576  | 2.171894  | 0.000000  |
| C  | 0.071717  | 1.993466  | -1.146287 |
| C  | 0.071717  | 1.993466  | 1.146287  |
| C  | -1.235240 | 1.693045  | -0.712906 |
| C  | -1.235240 | 1.693045  | 0.712906  |
| H  | 1.936811  | 2.409294  | 0.000000  |
| H  | 0.402257  | 2.060415  | -2.176345 |
| H  | 0.402257  | 2.060415  | 2.176345  |
| H  | -2.090345 | 1.509334  | -1.354379 |
| H  | -2.090345 | 1.509334  | 1.354379  |
| C  | -2.044901 | -1.089039 | 0.000000  |
| C  | -1.371878 | -1.575999 | -1.146211 |
| C  | -1.371878 | -1.575999 | 1.146211  |
| C  | -0.296945 | -2.386238 | -0.708015 |
| C  | -0.296945 | -2.386238 | 0.708015  |
| H  | -2.926578 | -0.460019 | 0.000000  |
| H  | -1.633981 | -1.371296 | -2.179329 |
| H  | -1.633981 | -1.371296 | 2.179329  |
| H  | 0.403296  | -2.922032 | -1.336168 |
| H  | 0.403296  | -2.922032 | 1.336168  |

$\text{Cp}_2\text{Mo}(\text{bdt})$

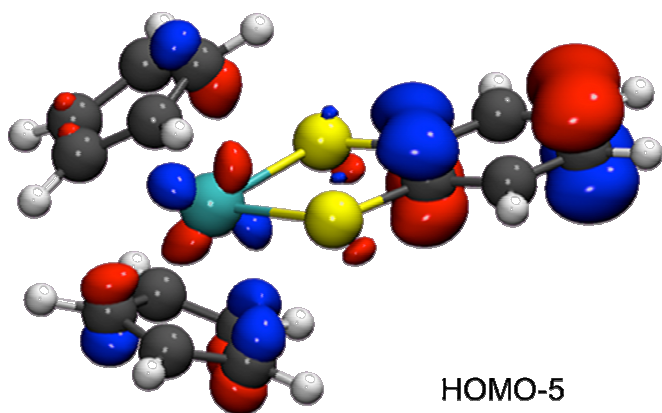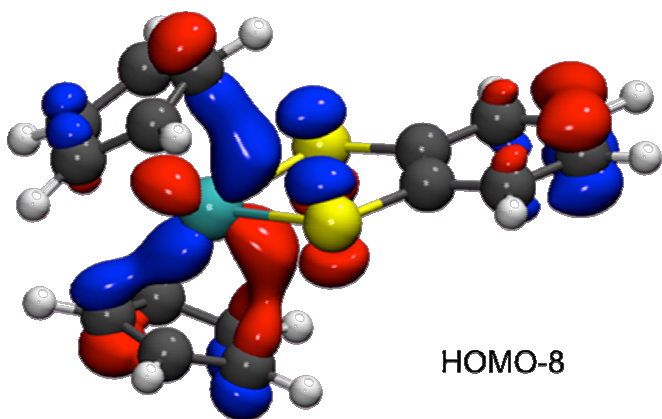

**Figure S5.** The calculated HOMO-5 and HOMO-8 of  $\text{Cp}_2\text{Mo}(\text{bdt})$  showing a nonbonding and bonding interaction between the Cp rings'  $\pi$ -system and the dithiolene  $\text{S}\pi^+$ . Their Kohn-Sham orbital energies were found to be 2.6 and 3.2 eV more stable than the HOMO of the molecule.

### Coordinates for distorted H<sub>2</sub>bdt structure

|   |          |           |          |
|---|----------|-----------|----------|
| C | 0.000000 | -0.698041 | 5.816643 |
| C | 0.000000 | 0.698042  | 5.816643 |
| C | 0.000000 | 1.389426  | 4.610311 |
| C | 0.000000 | 0.703943  | 3.391973 |
| C | 0.000000 | -0.703943 | 3.391973 |
| C | 0.000000 | -1.389426 | 4.610311 |
| S | 0.000000 | 1.956100  | 2.139816 |
| S | 0.000000 | -1.956100 | 2.139816 |
| H | 0.237192 | -2.986950 | 3.011340 |
| H | 0.237192 | 2.986950  | 3.011338 |
| H | 0.000000 | -1.256437 | 6.765405 |
| H | 0.000000 | 1.256438  | 6.765405 |
| H | 0.000000 | -2.492702 | 4.603476 |
| H | 0.000000 | 2.492702  | 4.603475 |

**Table S4.** Calculated vertical ionization energies for H<sub>2</sub>bdt structures in eV.

| Compound                                    | $\Delta\text{SCF}^{\text{a}}$ |
|---------------------------------------------|-------------------------------|
| H <sub>2</sub> bdt                          | 7.80                          |
| H <sub>2</sub> bdt – distorted <sup>b</sup> | 7.74                          |

<sup>a</sup> Calculated as the difference in the SCF of the neutral and cationic structure of the same geometry. <sup>b</sup> H<sub>2</sub>bdt with a lengthened S-S distance of 3.91 Å and with the S-p $\pi$  orbitals bent out of plane by 10°.
